# Supplementary material for: Collaborative Activities of Noradrenaline and Natriuretic Peptide for Glucose Utilization in Patients with Acute Coronary Syndrome
Source: PubMed Central journal article supplement (PMC6534620; doi:10.1038/s41598-019-44216-0), 2019-05-24
Supplement: 41598_2019_44216_MOESM1_ESM.pdf [file 41598_2019_44216_MOESM1_ESM.pdf]

## **Supplementary Information**

### **Collaborative Activities of Noradrenaline and Natriuretic Peptide for Glucose Utilization in Patients with Acute Coronary Syndrome.**

Goki Uno<sup>¶</sup>, Tomohisa Nagoshi<sup>¶</sup>, Akira Yoshii, Yasunori Inoue, Yoshiro Tanaka, Haruka Kimura, Satoshi Ito, Kazuo Ogawa, Toshikazu D. Tanaka, Kosuke Minai, Takayuki Ogawa, Makoto Kawai, Michihiro Yoshimura

[<sup>¶</sup>These authors contributed equally to this work.]

Division of Cardiology, Department of Internal Medicine,  
The Jikei University School of Medicine

**Supplementary Table S1. Clinical characteristics**

|                      | <b>ACS-rem<br/>(n=91)</b> | <b>P-Value<br/>vs ACS</b> |
|----------------------|---------------------------|---------------------------|
| Glucose, mg/dL       | 106.8±20.1                | < 0.001                   |
| Insulin, µU/mL       | 9.3±7.6                   | < 0.001                   |
| HOMA-IR              | 2.5±2.1                   | < 0.001                   |
| BNP, pg/mL           | 69.1±81.3                 | 0.002                     |
| Noradrenaline, pg/mL | 282.2±155.8               | < 0.001                   |

ACS-rem: remission phase of Acute Coronary Syndrome, BNP: B-type natriuretic peptide, HOMA-IR: homeostasis model assessment of insulin resistance

**Supplementary Table S2. The multiple regression analyses to identify the various potential clinical factors influencing the plasma glucose level.**

| ACS<br>R <sup>2</sup> =0.446 | Non-Standard Coefficient |                | Standard Regression Coefficient | Test statistic | P-value | 95% CI           | VIF   |
|------------------------------|--------------------------|----------------|---------------------------------|----------------|---------|------------------|-------|
|                              | Regression Coefficient   | Standard Error |                                 |                |         |                  |       |
| HbA1c                        | 28.971                   | 2.775          | 0.556                           | 10.439         | <0.001  | 23.498 to 34.443 | 1.080 |
| BNP                          | -0.043                   | 0.017          | -0.150                          | -2.565         | 0.011   | -0.076 to -0.010 | 1.305 |
| Noradrenaline                | 0.069                    | 0.012          | 0.345                           | 5.982          | <0.001  | 0.046 to 0.092   | 1.263 |
| BMI                          | -0.450                   | 0.700          | -0.036                          | -0.643         | 0.521   | -1.831 to 0.931  | 1.189 |
| TG                           | -0.023                   | 0.030          | -0.043                          | -0.781         | 0.436   | -0.081 to 0.035  | 1.181 |
| LDL-C                        | 0.012                    | 0.086          | 0.008                           | 0.137          | 0.891   | -0.157 to 0.181  | 1.179 |
| HDL-C                        | -0.089                   | 0.230          | -0.022                          | -0.389         | 0.698   | -0.542 to 0.364  | 1.236 |
| Hypertension                 | -4.661                   | 5.992          | -0.043                          | -0.778         | 0.438   | -16.475 to 7.154 | 1.143 |

  

| Non-ACS<br>R <sup>2</sup> =0.468 | Non-Standard Coefficient |                | Standard Regression Coefficient | Test statistic | P-value | 95% CI           | VIF   |
|----------------------------------|--------------------------|----------------|---------------------------------|----------------|---------|------------------|-------|
|                                  | Regression Coefficient   | Standard Error |                                 |                |         |                  |       |
| HbA1c                            | 21.595                   | 0.821          | 0.671                           | 26.308         | <0.001  | 19.984 to 23.207 | 1.038 |
| BNP                              | -0.004                   | 0.003          | -0.030                          | -1.107         | 0.269   | -0.011 to 0.003  | 1.135 |
| Noradrenaline                    | 0.009                    | 0.005          | 0.049                           | 1.840          | 0.066   | -0.001 to 0.019  | 1.115 |
| BMI                              | 0.436                    | 0.209          | 0.057                           | 2.083          | 0.038   | 0.025 to 0.847   | 1.214 |
| TG                               | -0.017                   | 0.010          | -0.044                          | -1.611         | 0.107   | -0.037 to 0.004  | 1.190 |

|              |       |       |       |       |              |                 |       |
|--------------|-------|-------|-------|-------|--------------|-----------------|-------|
| LDL-C        | 0.022 | 0.026 | 0.022 | 0.871 | <i>0.384</i> | -0.028 to 0.073 | 1.062 |
| HDL-C        | 0.028 | 0.050 | 0.015 | 0.554 | <i>0.580</i> | -0.070 to 0.126 | 1.170 |
| Hypertension | 2.389 | 1.601 | 0.038 | 1.492 | <i>0.136</i> | -0.753 to 5.530 | 1.045 |

R<sup>2</sup>: adjusted coefficient of determination, CI: confidence interval, VIF: variance inflation factor.

ACS: Acute Coronary Syndrome, BMI: body mass index, BNP: B-type natriuretic peptide, HbA1c: hemoglobin A1c, HDL-C: high-density lipoprotein, LDL-C: low-density lipoprotein, TG: triglycerides.

**Supplementary Table S3. The multiple regression analyses to identify the various potential clinical factors influencing HOMA-IR level.**

| ACS<br>R <sup>2</sup> =0.147 | Non-Standard Coefficient |                | Standard Regression Coefficient | Test statistic | P-value | 95% CI           | VIF   |
|------------------------------|--------------------------|----------------|---------------------------------|----------------|---------|------------------|-------|
|                              | Regression Coefficient   | Standard Error |                                 |                |         |                  |       |
| HbA1c                        | 0.812                    | 0.554          | 0.097                           | 1.466          | 0.144   | -0.280 to 1.905  | 1.081 |
| BNP                          | -0.007                   | 0.003          | -0.157                          | -2.161         | 0.032   | -0.014 to -0.001 | 1.305 |
| Noradrenaline                | 0.008                    | 0.002          | 0.247                           | 3.448          | 0.001   | 0.003 to 0.013   | 1.263 |
| BMI                          | 0.496                    | 0.140          | 0.247                           | 3.550          | <0.001  | 0.220 to 0.771   | 1.189 |
| TG                           | 0.000                    | 0.006          | 0.001                           | 0.017          | 0.986   | -0.012 to 0.012  | 1.181 |
| LDL-C                        | 0.012                    | 0.017          | 0.047                           | 0.681          | 0.497   | -0.022 to 0.045  | 1.178 |
| HDL-C                        | -0.029                   | 0.046          | -0.046                          | -0.644         | 0.520   | -0.120 to 0.061  | 1.236 |
| Hypertension                 | -0.293                   | 1.196          | -0.017                          | -0.245         | 0.806   | -2.653 to 2.066  | 1.144 |

  

| Non-ACS<br>R <sup>2</sup> =0.100 | Non-Standard Coefficient |                | Standard Regression Coefficient | Test statistic | P-value | 95% CI          | VIF   |
|----------------------------------|--------------------------|----------------|---------------------------------|----------------|---------|-----------------|-------|
|                                  | Regression Coefficient   | Standard Error |                                 |                |         |                 |       |
| HbA1c                            | 0.686                    | 0.107          | 0.213                           | 6.412          | <0.001  | 0.476 to 0.896  | 1.038 |
| BNP                              | 0.000                    | 0.000          | -0.019                          | -0.540         | 0.590   | -0.001 to 0.001 | 1.137 |
| Noradrenaline                    | 0.002                    | 0.001          | 0.095                           | 2.765          | 0.006   | 0.001 to 0.003  | 1.116 |
| BMI                              | 0.112                    | 0.027          | 0.148                           | 4.120          | <0.001  | 0.059 to 0.166  | 1.214 |
| TG                               | 0.003                    | 0.001          | 0.067                           | 1.879          | 0.061   | 0.000 to 0.005  | 1.190 |

|              |        |       |        |        |              |                 |       |
|--------------|--------|-------|--------|--------|--------------|-----------------|-------|
| LDL-C        | 0.002  | 0.003 | 0.019  | 0.563  | <i>0.574</i> | -0.005 to 0.008 | 1.061 |
| HDL-C        | -0.008 | 0.007 | -0.045 | -1.273 | <i>0.203</i> | -0.021 to 0.004 | 1.170 |
| Hypertension | 0.138  | 0.209 | 0.022  | 0.660  | <i>0.509</i> | -0.272 to 0.547 | 1.044 |

---

R<sup>2</sup>: adjusted coefficient of determination, CI: confidence interval, VIF: variance inflation factor.

ACS: Acute Coronary Syndrome, BMI: body mass index, BNP: B-type natriuretic peptide, HbA1c: hemoglobin A1c, HDL-C: high-density lipoprotein, HOMA-IR: homeostasis model assessment of insulin resistance, LDL-C: low-density lipoprotein, TG: triglycerides.

**Supplementary Table S4. The multiple regression analyses to identify the clinical factors including pharmacological therapy influencing the plasma glucose level.**

| ACS<br>R <sup>2</sup> =0.465 | Non-Standard Coefficient |                | Standard Regression Coefficient | Test statistic | P-value | 95% CI            | VIF   |
|------------------------------|--------------------------|----------------|---------------------------------|----------------|---------|-------------------|-------|
|                              | Regression Coefficient   | Standard Error |                                 |                |         |                   |       |
| HbA1c                        | 26.925                   | 3.207          | 0.519                           | 8.395          | <0.001  | 20.601 to 33.249  | 1.523 |
| BNP                          | -0.040                   | 0.015          | -0.147                          | -2.617         | 0.010   | -0.069 to -0.010  | 1.247 |
| Noradrenaline                | 0.069                    | 0.011          | 0.343                           | 6.151          | <0.001  | 0.047 to 0.091    | 1.241 |
| ACE inhibitors               | 27.812                   | 12.490         | 0.125                           | 2.227          | 0.027   | 3.186 to 52.438   | 1.253 |
| ARBs                         | -6.748                   | 7.407          | -0.054                          | -0.911         | 0.363   | -21.352 to 7.855  | 1.401 |
| Beta blockers                | -19.088                  | 7.725          | -0.143                          | -2.471         | 0.014   | -34.319 to -3.857 | 1.325 |
| CCBs                         | -1.400                   | 6.877          | -0.012                          | -0.204         | 0.839   | -14.960 to 12.160 | 1.465 |
| Diuretics                    | -5.574                   | 10.237         | -0.029                          | -0.544         | 0.587   | -25.759 to 14.610 | 1.136 |
| OHAs                         | 8.237                    | 8.659          | 0.059                           | 0.951          | 0.343   | -8.836 to 25.310  | 1.509 |

  

| Non-ACS<br>R <sup>2</sup> =0.483 | Non-Standard Coefficient |                | Standard Regression Coefficient | Test statistic | P-value | 95% CI           | VIF   |
|----------------------------------|--------------------------|----------------|---------------------------------|----------------|---------|------------------|-------|
|                                  | Regression Coefficient   | Standard Error |                                 |                |         |                  |       |
| HbA1c                            | 18.459                   | 1.002          | 0.574                           | 18.430         | <0.001  | 16.493 to 20.425 | 1.594 |
| BNP                              | -0.006                   | 0.003          | -0.049                          | -1.842         | 0.066   | -0.013 to 0.000  | 1.142 |
| Noradrenaline                    | 0.010                    | 0.005          | 0.053                           | 1.997          | 0.046   | 0.000 to 0.020   | 1.140 |
| ACE inhibitors                   | -1.348                   | 1.729          | -0.022                          | -0.779         | 0.436   | -4.741 to 2.046  | 1.344 |

|               |        |       |       |       |        |                 |       |
|---------------|--------|-------|-------|-------|--------|-----------------|-------|
| ARBs          | 0.420  | 1.578 | 0.008 | 0.266 | 0.790  | -2.677 to 3.516 | 1.362 |
| Beta blockers | 0.913  | 1.371 | 0.017 | 0.666 | 0.505  | -1.777 to 3.604 | 1.080 |
| CCBs          | 0.100  | 1.384 | 0.002 | 0.072 | 0.943  | -2.617 to 2.817 | 1.083 |
| Diuretics     | 1.483  | 1.852 | 0.021 | 0.801 | 0.423  | -2.152 to 5.117 | 1.186 |
| OHAs          | 10.643 | 1.855 | 0.178 | 5.737 | <0.001 | 7.002 to 14.284 | 1.577 |

R<sup>2</sup>: adjusted coefficient of determination, CI: confidence interval, VIF: variance inflation factor.

ACE: angiotensin converting enzyme, ACS: Acute Coronary Syndrome, ARBs: angiotensin II type I-receptor blockers, BNP: B-type natriuretic peptide, CCBs: calcium channel blockers, HbA1c: hemoglobin A1c, OHAs: oral hypoglycemic agents.



**Supplementary Table S5. The multiple regression analyses to identify the clinical factors including pharmacological therapy influencing HOMA-IR level.**

| ACS<br>R <sup>2</sup> =0.094 | Non-Standard Coefficient |                | Standard Regression Coefficient | Test statistic | P-value | 95% CI           | VIF   |
|------------------------------|--------------------------|----------------|---------------------------------|----------------|---------|------------------|-------|
|                              | Regression Coefficient   | Standard Error |                                 |                |         |                  |       |
| HbA1c                        | 1.136                    | 0.675          | 0.136                           | 1.682          | 0.094   | -0.196 to 2.467  | 1.530 |
| BNP                          | -0.010                   | 0.003          | -0.219                          | -2.961         | 0.003   | -0.017 to -0.003 | 1.275 |
| Noradrenaline                | 0.009                    | 0.002          | 0.268                           | 3.679          | <0.001  | 0.004 to 0.013   | 1.237 |
| ACE inhibitors               | 4.544                    | 2.619          | 0.127                           | 1.735          | 0.084   | -0.619 to 9.708  | 1.255 |
| ARBs                         | 0.369                    | 1.557          | 0.018                           | 0.237          | 0.813   | -2.701 to 3.440  | 1.390 |
| Beta blockers                | -1.592                   | 1.622          | -0.074                          | -0.982         | 0.327   | -4.790 to 1.606  | 1.329 |
| CCBs                         | 1.485                    | 1.444          | 0.081                           | 1.028          | 0.305   | -1.362 to 4.331  | 1.455 |
| Diuretics                    | -1.945                   | 2.152          | -0.063                          | -0.904         | 0.367   | -6.188 to 2.298  | 1.144 |
| OHAs                         | -0.046                   | 1.817          | -0.002                          | -0.026         | 0.980   | -3.629 to 3.536  | 1.512 |

  

| Non-ACS<br>R <sup>2</sup> =0.069 | Non-Standard Coefficient |                | Standard Regression Coefficient | Test statistic | P-value | 95% CI          | VIF   |
|----------------------------------|--------------------------|----------------|---------------------------------|----------------|---------|-----------------|-------|
|                                  | Regression Coefficient   | Standard Error |                                 |                |         |                 |       |
| HbA1c                            | 0.928                    | 0.135          | 0.288                           | 6.889          | <0.001  | 0.664 to 1.193  | 1.593 |
| BNP                              | -0.001                   | 0.000          | -0.059                          | -1.664         | 0.097   | -0.002 to 0.000 | 1.142 |
| Noradrenaline                    | 0.001                    | 0.001          | 0.077                           | 2.160          | 0.031   | 0.000 to 0.003  | 1.142 |
| ACE inhibitors                   | 0.215                    | 0.233          | 0.035                           | 0.922          | 0.357   | -0.243 to 0.672 | 1.344 |

|               |        |       |        |        |              |                 |       |
|---------------|--------|-------|--------|--------|--------------|-----------------|-------|
| ARBs          | -0.004 | 0.213 | -0.001 | -0.019 | <i>0.985</i> | -0.421 to 0.413 | 1.362 |
| Beta blockers | 0.177  | 0.185 | 0.033  | 0.957  | <i>0.339</i> | -0.186 to 0.539 | 1.080 |
| CCBs          | -0.163 | 0.187 | -0.030 | -0.873 | <i>0.383</i> | -0.529 to 0.203 | 1.081 |
| Diuretics     | 0.248  | 0.249 | 0.036  | 0.994  | <i>0.321</i> | -0.242 to 0.737 | 1.188 |
| OHAs          | -0.415 | 0.250 | -0.069 | -1.662 | <i>0.097</i> | -0.905 to 0.075 | 1.576 |

R<sup>2</sup>: adjusted coefficient of determination, CI: confidence interval, VIF: variance inflation factor.

ACE: angiotensin converting enzyme, ACS: Acute Coronary Syndrome, ARBs: angiotensin II type I-receptor blockers, BNP: B-type natriuretic peptide, CCBs: calcium channel blockers, HbA1c: hemoglobin A1c, HOMA-IR: homeostasis model assessment of insulin resistance, OHAs: oral hypoglycemic agents.

**Supplementary Table S6. The multiple regression analyses to identify the clinical factors influencing the plasma glucose level.**

| ACS-rem<br>R <sup>2</sup> =0.324 | Non-Standard Coefficient |                | Standard Regression Coefficient | Test statistic | P-value | 95% CI          | VIF   |
|----------------------------------|--------------------------|----------------|---------------------------------|----------------|---------|-----------------|-------|
|                                  | Regression Coefficient   | Standard Error |                                 |                |         |                 |       |
| HbA1c                            | 8.820                    | 1.679          | 0.462                           | 5.253          | <0.001  | 5.483 to 12.157 | 1.028 |
| BNP                              | -0.028                   | 0.021          | -0.113                          | -1.303         | 0.196   | -0.071 to 0.015 | 1.001 |
| Noradrenaline                    | 0.036                    | 0.011          | 0.283                           | 3.219          | 0.002   | 0.014 to 0.059  | 1.027 |

R<sup>2</sup>: adjusted coefficient of determination, CI: confidence interval, VIF: variance inflation factor.

ACS-rem: remission phase of Acute Coronary Syndrome, BNP: B-type natriuretic peptide, HbA1c: hemoglobin A1c.

**Supplementary Table S7. The multiple regression analyses to identify the clinical factors influencing HOMA-IR level.**

| ACS-rem<br>R <sup>2</sup> =0.074 | Non-Standard Coefficient |                | Standard Regression Coefficient | Test statistic | P-value | 95% CI          | VIF   |
|----------------------------------|--------------------------|----------------|---------------------------------|----------------|---------|-----------------|-------|
|                                  | Regression Coefficient   | Standard Error |                                 |                |         |                 |       |
| HbA1c                            | 0.453                    | 0.206          | 0.226                           | 2.197          | 0.031   | 0.043 to 0.863  | 1.028 |
| BNP                              | -0.004                   | 0.003          | -0.145                          | -1.431         | 0.156   | -0.009 to 0.001 | 1.001 |
| Noradrenaline                    | 0.002                    | 0.001          | 0.150                           | 1.463          | 0.147   | -0.001 to 0.005 | 1.027 |

R<sup>2</sup>: adjusted coefficient of determination, CI: confidence interval, VIF: variance inflation factor.

ACS-rem: remission phase of Acute Coronary Syndrome, BNP: B-type natriuretic peptide, HbA1c: hemoglobin A1c, HOMA-IR: homeostasis model assessment of insulin resistance

**Supplementary Table S8. The results of path model based on covariance structure analyses.**

| Clinical Factor                    |                 | Estimate | Standard error | Test statistic | <i>P-value</i> |
|------------------------------------|-----------------|----------|----------------|----------------|----------------|
| <b>Path model (E)</b>              |                 |          |                |                |                |
| Glucose<br>(R <sup>2</sup> =0.429) | ← BNP           | -0.049   | 0.015          | -3.361         | <0.001         |
|                                    | ← Noradrenaline | 0.071    | 0.011          | 6.514          | < 0.001        |
|                                    | ← HbA1c         | 28.602   | 2.672          | 10.705         | < 0.001        |
|                                    | ← BMI           | -0.532   | 0.676          | -0.787         | 0.431          |
|                                    | ← TG            | -0.023   | 0.025          | -0.922         | 0.356          |
|                                    | ← LDL-C         | 0.008    | 0.082          | 0.093          | 0.926          |
|                                    | ← HDL-C         | -0.101   | 0.222          | -0.455         | 0.649          |
|                                    | ← Hypertension  | -4.717   | 5.779          | -0.816         | 0.414          |
| <b>Path model (F)</b>              |                 |          |                |                |                |
| Glucose<br>(R <sup>2</sup> =0.472) | ← BNP           | -0.004   | 0.003          | -1.173         | 0.241          |
|                                    | ← Noradrenaline | 0.009    | 0.005          | 1.887          | 0.059          |
|                                    | ← HbA1c         | 21.604   | 0.815          | 26.516         | < 0.001        |
|                                    | ← BMI           | 0.421    | 0.202          | 2.078          | 0.038          |
|                                    | ← TG            | -0.016   | 0.010          | -1.584         | 0.113          |
|                                    | ← LDL-C         | 0.021    | 0.025          | 0.818          | 0.413          |
|                                    | ← HDL-C         | 0.029    | 0.049          | 0.600          | 0.548          |
|                                    | ← Hypertension  | 2.439    | 1.567          | 1.556          | 0.120          |
| <b>Path model (G)</b>              |                 |          |                |                |                |
| HOMA-IR<br>(R <sup>2</sup> =0.153) | ← BNP           | -0.007   | 0.003          | -2.450         | 0.014          |
|                                    | ← Noradrenaline | 0.008    | 0.002          | 3.651          | < 0.001        |
|                                    | ← HbA1c         | 0.813    | 0.533          | 1.526          | 0.127          |
|                                    | ← BMI           | 0.496    | 0.135          | 3.676          | <0.001         |
|                                    | ← TG            | 0.000    | 0.005          | 0.058          | 0.954          |
|                                    | ← LDL-C         | 0.012    | 0.016          | 0.727          | 0.467          |
|                                    | ← HDL-C         | -0.029   | 0.044          | -0.653         | 0.514          |
|                                    | ← Hypertension  | -0.312   | 1.152          | -0.271         | 0.786          |
| <b>Path model (H)</b>              |                 |          |                |                |                |
| HOMA-IR<br>(R <sup>2</sup> =0.110) | ← BNP           | 0.000    | 0.000          | -0.546         | 0.585          |
|                                    | ← Noradrenaline | 0.002    | 0.001          | 2.835          | 0.005          |
|                                    | ← HbA1c         | 0.683    | 0.106          | 6.438          | < 0.001        |
|                                    | ← BMI           | 0.112    | 0.026          | 4.252          | < 0.001        |
|                                    | ← TG            | 0.003    | 0.001          | 1.899          | 0.058          |
|                                    | ← LDL-C         | 0.002    | 0.003          | 0.589          | 0.556          |
|                                    | ← HDL-C         | -0.008   | 0.006          | -1.314         | 0.189          |
|                                    | ← Hypertension  | 0.134    | 0.204          | 0.657          | 0.511          |

The results (direct effect) of the path model theoretically proposed analysis to identify the clinical factors influencing the plasma glucose levels or HOMA-IR using ACS subjects (**Path models E and G**) and using non-ACS subjects (**Path models F and H**) (see Supplementary Fig. S2).

R<sup>2</sup>: squared multiple correlations.

BMI: body mass index, BNP: B-type natriuretic peptide, HbA1c: hemoglobin A1c, HDL-C: high-density lipoprotein, HOMA-IR: homeostasis model assessment of insulin resistance, LDL-C: low-density lipoprotein, TG: triglycerides.

**Supplementary Table S9. The results of path model based on covariance structure analyses.**

| Clinical Factor            |   |               | Estimate | Standard error | Test statistic | <i>P-value</i>    |
|----------------------------|---|---------------|----------|----------------|----------------|-------------------|
| <b>Path model (I)</b>      |   |               |          |                |                |                   |
| Glucose<br>( $R^2=0.319$ ) | ← | BNP           | -0.028   | 0.021          | -1.326         | <i>0.185</i>      |
|                            | ← | Noradrenaline | 0.036    | 0.011          | 3.318          | <i>&lt; 0.001</i> |
|                            | ← | HbA1c         | 8.820    | 1.628          | 5.416          | <i>&lt; 0.001</i> |
| <b>Path model (J)</b>      |   |               |          |                |                |                   |
| HOMA-IR<br>( $R^2=0.096$ ) | ← | BNP           | -0.004   | 0.003          | -1.456         | <i>0.145</i>      |
|                            | ← | Noradrenaline | 0.002    | 0.001          | 1.508          | <i>0.132</i>      |
|                            | ← | HbA1c         | 0.453    | 0.200          | 2.265          | <i>0.024</i>      |

The results (direct effect) of the path model theoretically proposed analysis to identify the clinical factors influencing the plasma glucose level or HOMA-IR using ACS-rem subjects (**Path models I and J**) (see Supplementary Fig. S3).

$R^2$ : squared multiple correlations.

BNP: B-type natriuretic peptide, HbA1c: hemoglobin A1c, HOMA-IR: homeostasis model assessment of insulin resistance.

## Supplementary Figure Legends

### Supplementary Figure S1. Associations between BNP, noradrenaline and plasma glucose levels.

The simple regression analyses between BNP and plasma glucose (top panel), between noradrenaline and plasma glucose (middle panel) in ACS subjects (left side) and in non-ACS subjects (right side) are shown. Comparison of plasma glucose levels among four groups divided by indicated BNP levels in ACS (left side) and in non-ACS (right side) are shown in the bottom panels.

ACS = Acute Coronary Syndrome; BNP = B-type natriuretic peptide

### Supplementary Figure S2. Path diagrams against plasma glucose and HOMA-IR levels (including various potential clinical factors).

Path models theoretically proposed to clarify the contribution of various potential clinical factors to glucose as well as to HOMA-IR levels in ACS subjects (n=216) (*Path model E and G, respectively*) and in non-ACS subjects (n=856) (*Path model F and H, respectively*). Each path has a coefficient showing the standardized coefficient of a regressing independent variable on a dependent variable of the relevant path. These variables indicate standardized regression coefficients (direct effect) [underlined portions indicate remarkable values], squared multiple correlations [narrow italics] and correlations among exogenous variables [green]. ACS = acute coronary syndrome; BMI = body mass index; BNP = B-type natriuretic peptide; e = extraneous variable; HbA1c = hemoglobin A1c; HDL-C = high-density lipoprotein; HOMA-IR, homeostasis model assessment of insulin resistance; HTN = hypertension; LDL-C = low-density lipoprotein; NorAd = noradrenaline; TG = triglycerides.

### Supplementary Figure S3. Path diagrams against plasma glucose and HOMA-IR levels in ACS-rem subjects.

Path models theoretically proposed to clarify a contribution of BNP and noradrenaline to either plasma glucose levels (*Path model I*) or HOMA-IR levels (*Path model J*) in ACS-remission phase subjects (n=91). Each path has a coefficient showing the standardized coefficient of a regressing independent variable on a dependent variable of the relevant path. These variables indicate standardized regression coefficients (direct effect) [underlined portions indicate remarkable values], squared multiple correlations [narrow italics] and correlations among exogenous variables [green].

ACS-rem = remission phase of Acute Coronary Syndrome; BNP = B-type natriuretic peptide; e = extraneous variable; HbA1c = hemoglobin A1c; HOMA-IR, homeostasis model assessment of insulin resistance; NorAd = noradrenaline

### Supplementary Figure S4. Bayesian estimation.

Bivariate marginal posterior distributions are shown to visualize the relationships among pairs of estimands. A credible region (indicated as CI) is conceptually similar to a bivariate confidence region that is familiar to most data analysts acquainted with classical statistical inference methods.



## ACS

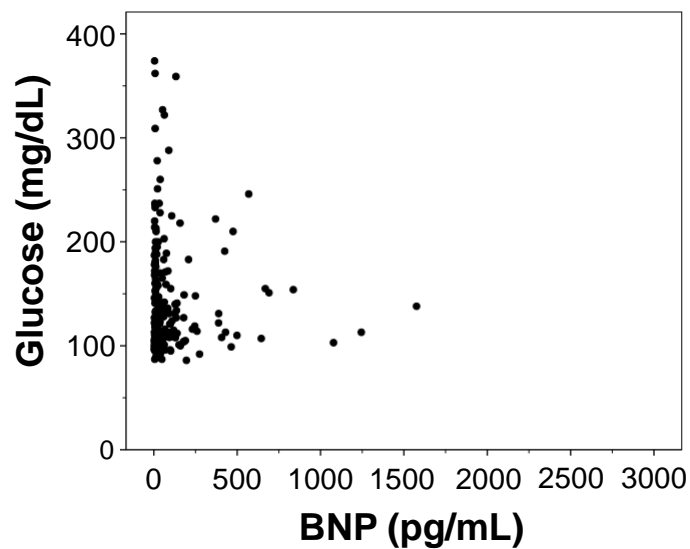

## Non-ACS

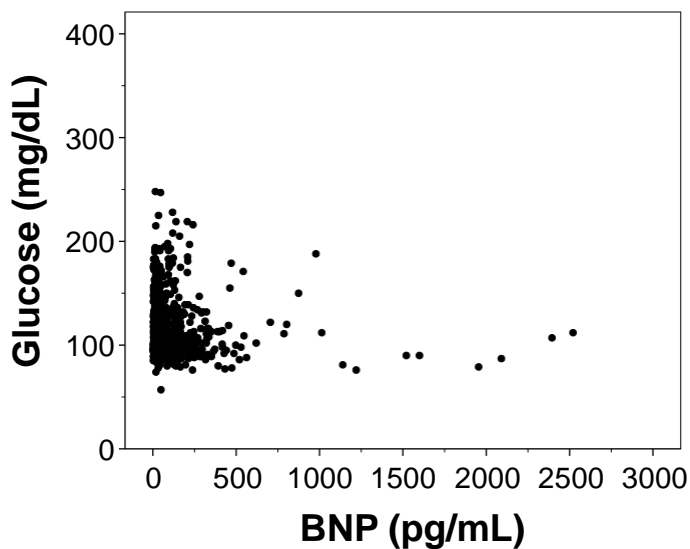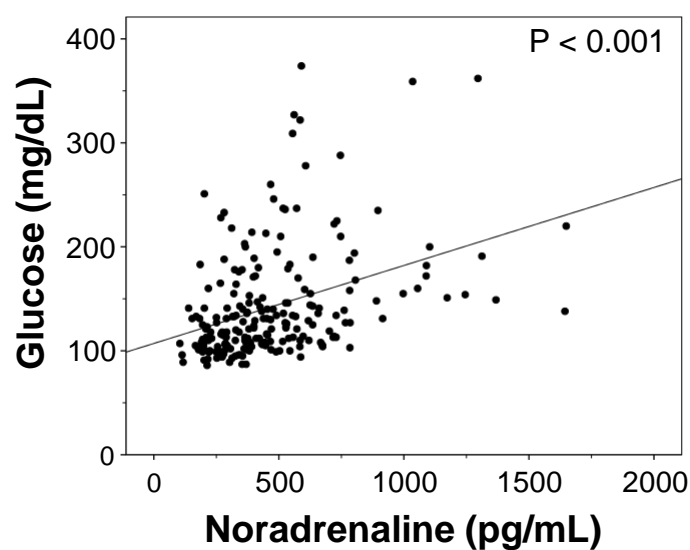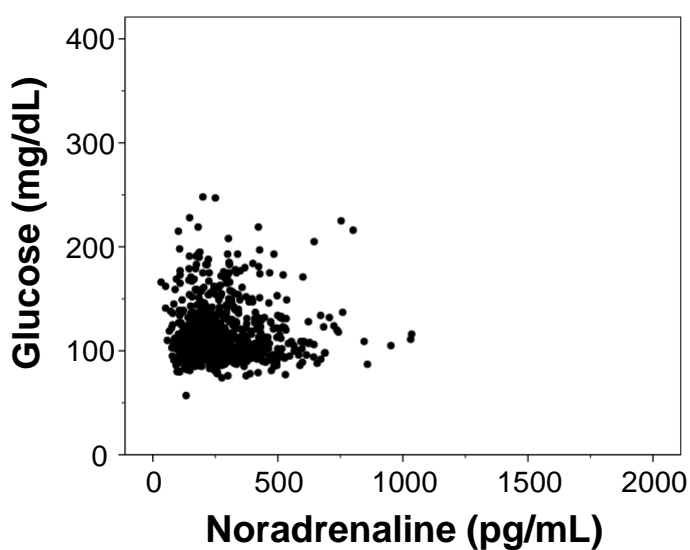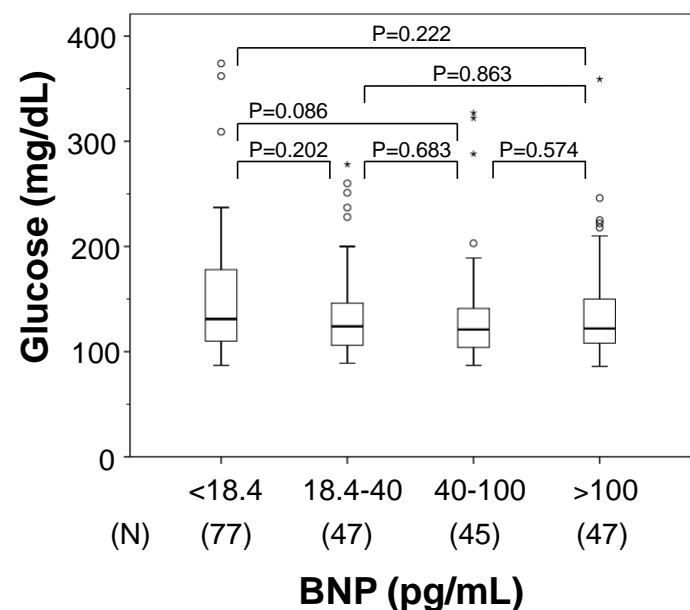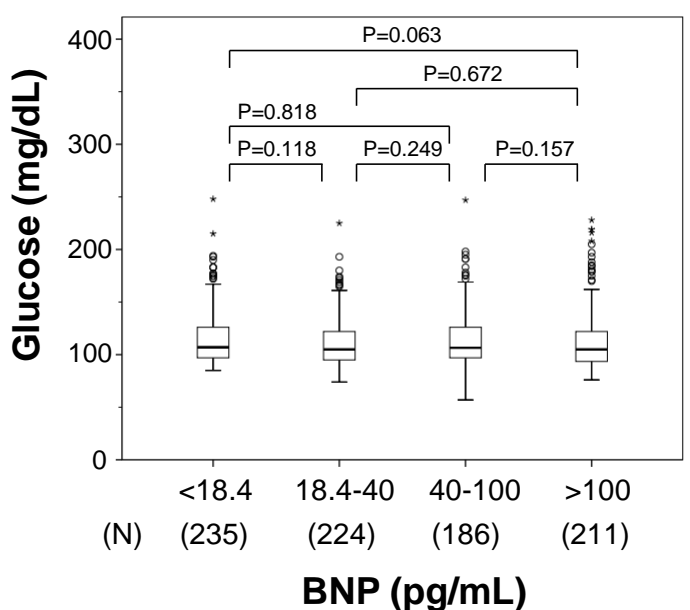

***Path model E. ACS***

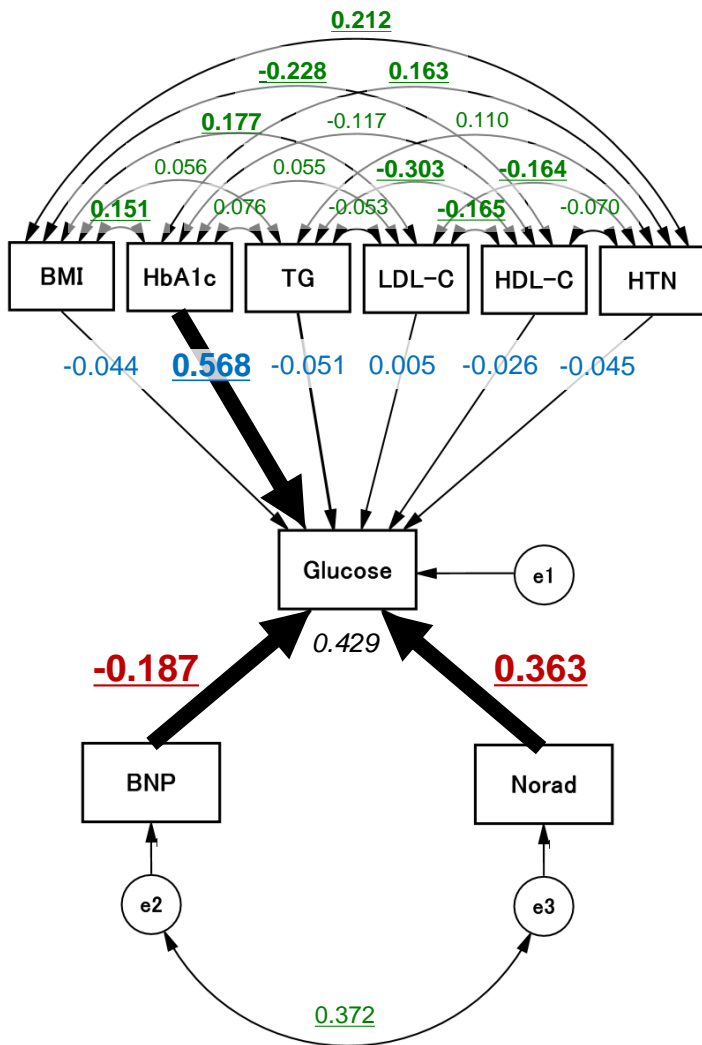

***Path model F. Non-ACS***

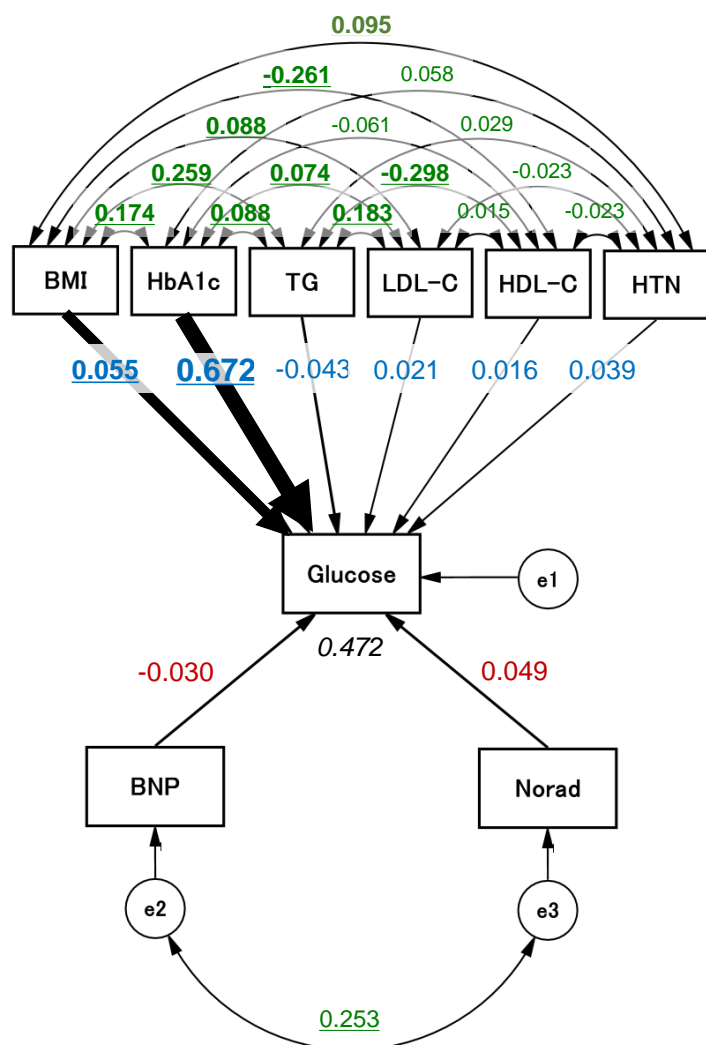

***Path model G. ACS***

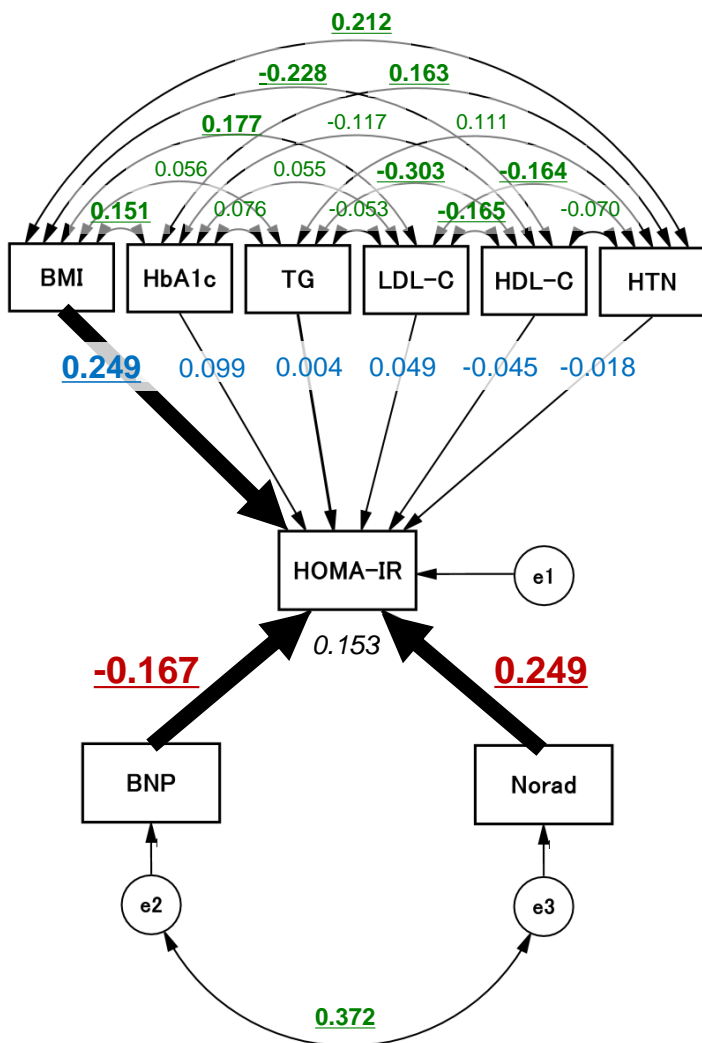

***Path model H. Non-ACS***

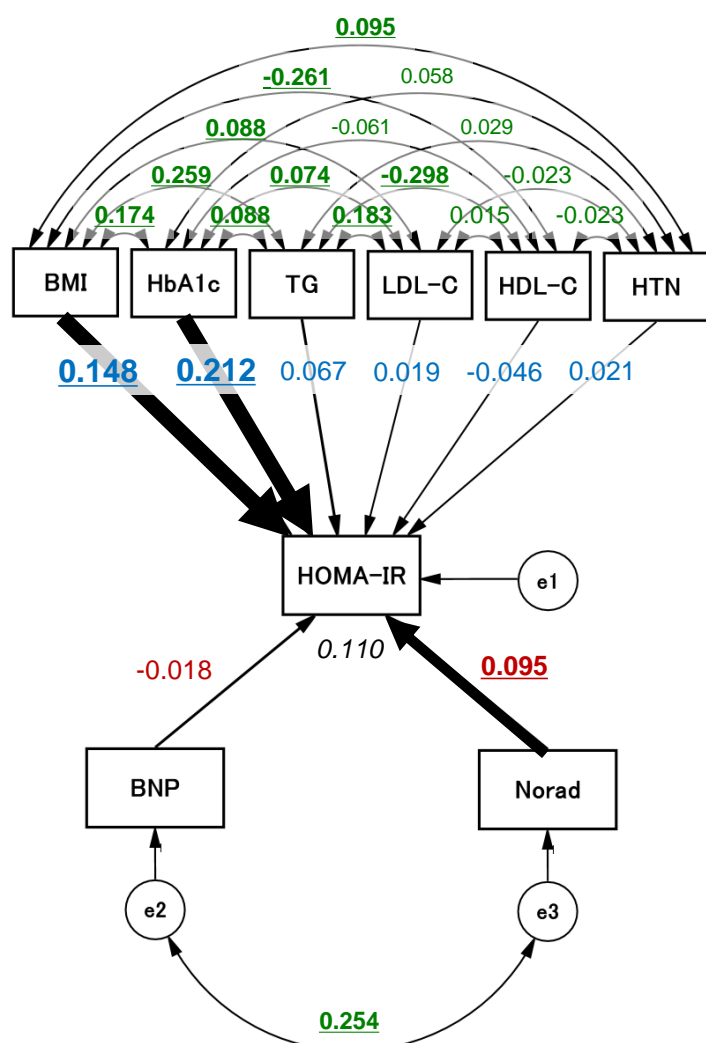

**Path model I. ACS-rem**

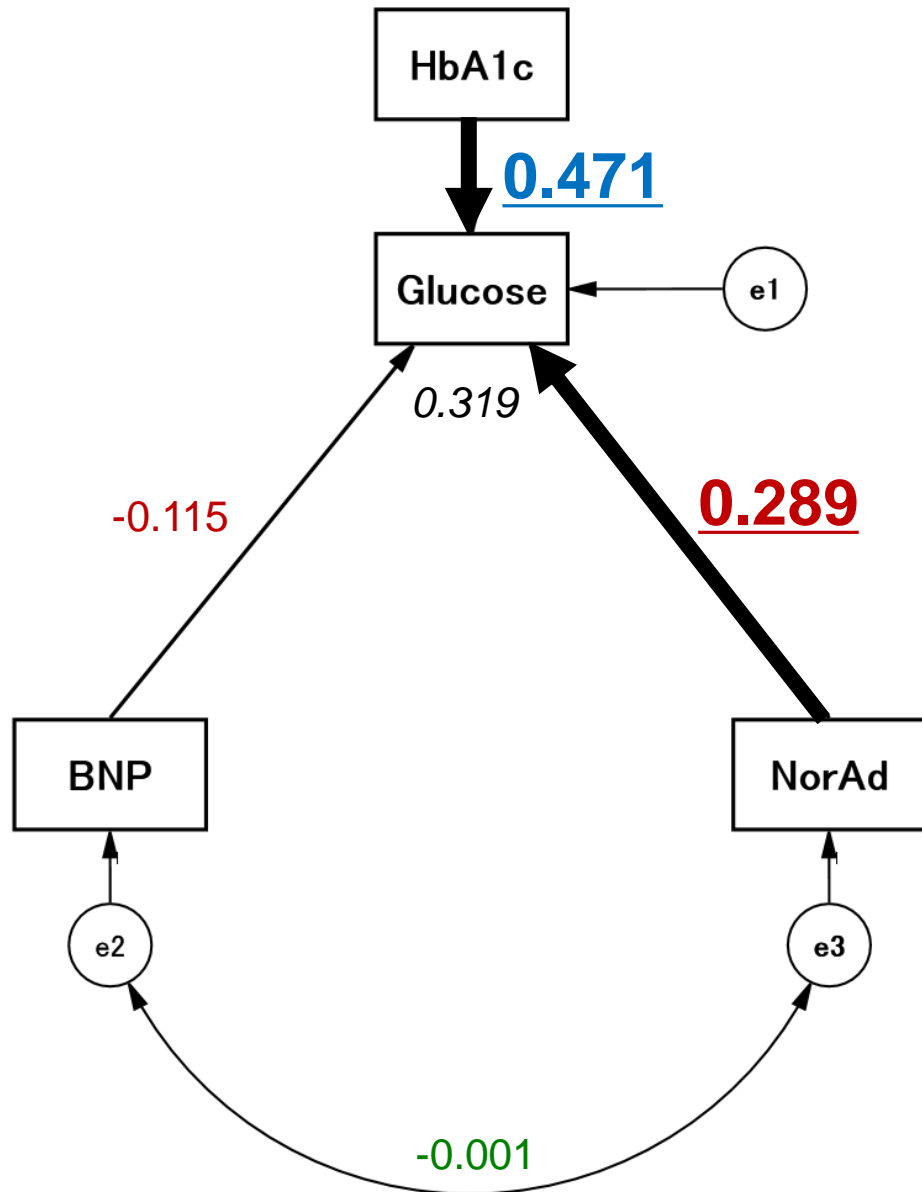

**Path model J. ACS-rem**

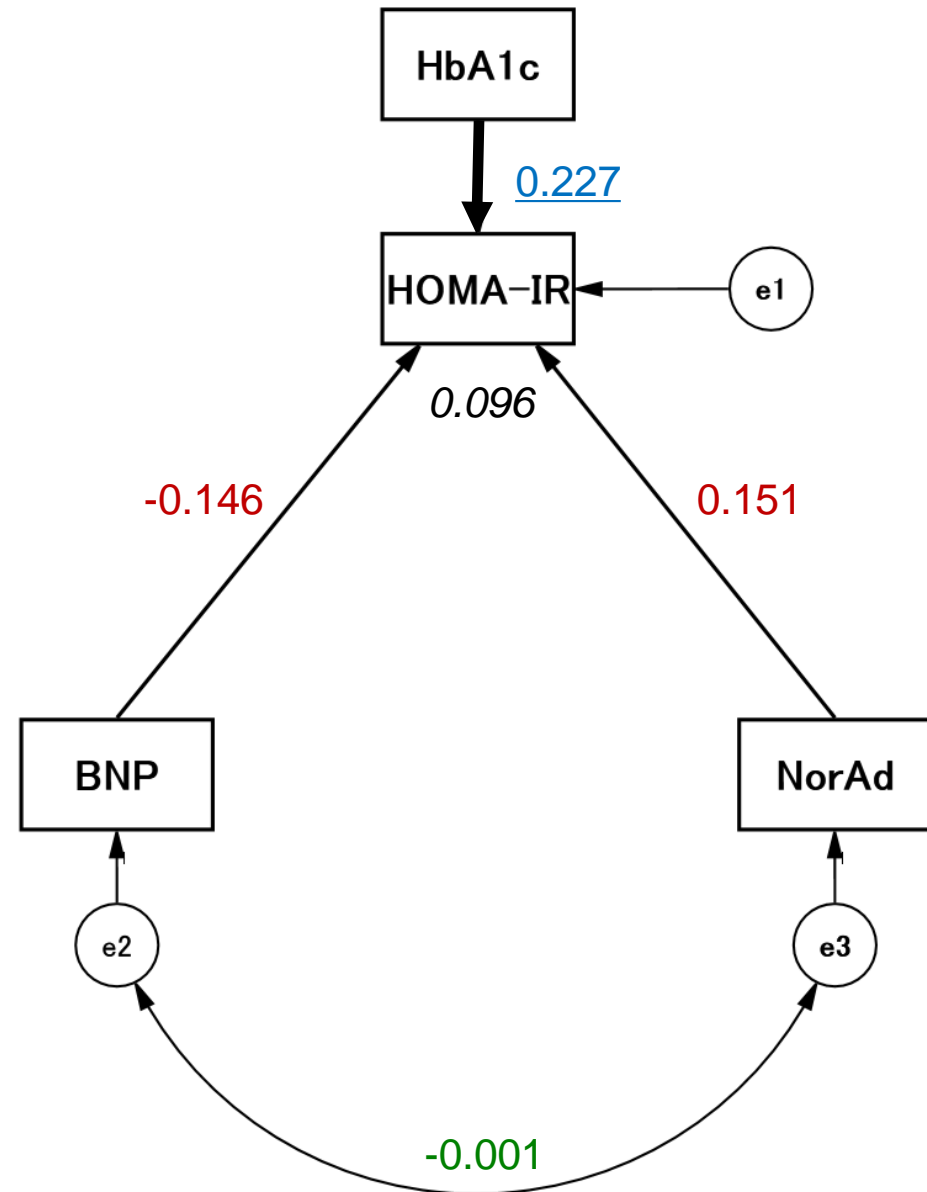

**Supplementary Figure S3**

# ACS-rem

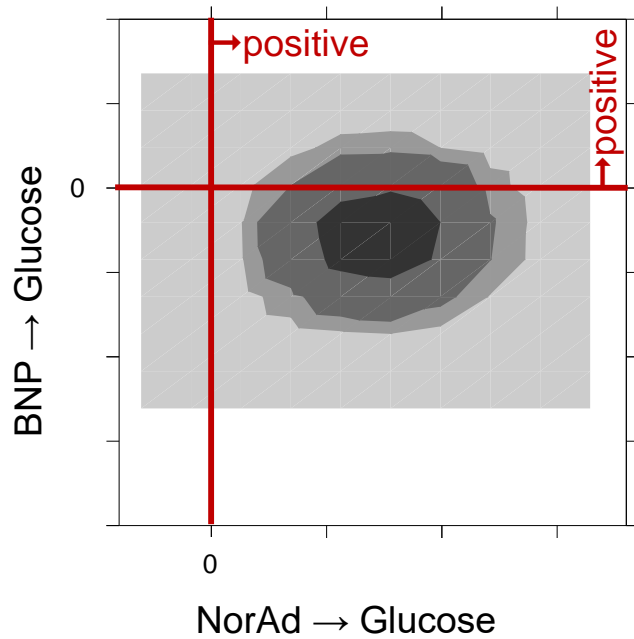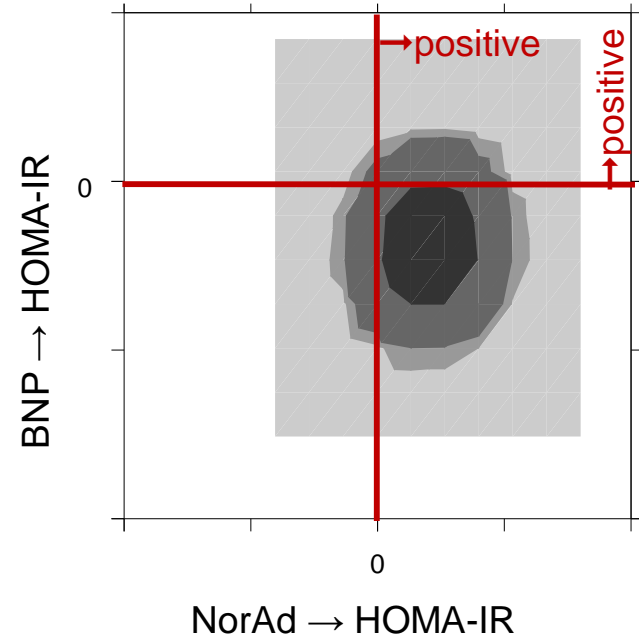

CI : Confidence intervals

- 50% CI
- 90% CI
- 95% CI
